# Supplementary material
Source: Springer Nature journal article supplement (https://www.springermedizin.de/resource/supplementary/12990_2008_184_MOESM12_ESM.pdf/9612758)

4 hr

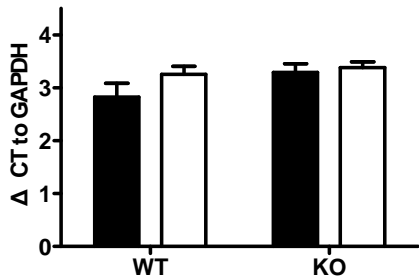

Day 2

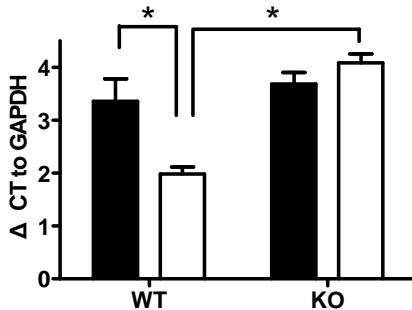

Day 7

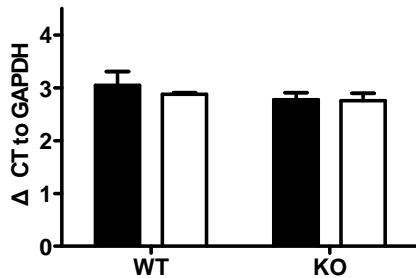

■ Saline □ Carrageenan

Supplement: MOESM12 [file 9612758]
